# Supplementary material for: Polycyclic Aromatic Hydrocarbons (PAHs) in Roasted Pork Meat and the Effect of Dried Fruits on PAH Content
Source: MDPI journal article supplement (doi:10.3390/ijerph20064922), 2023-03-10
Supplement: s1 [file s1]

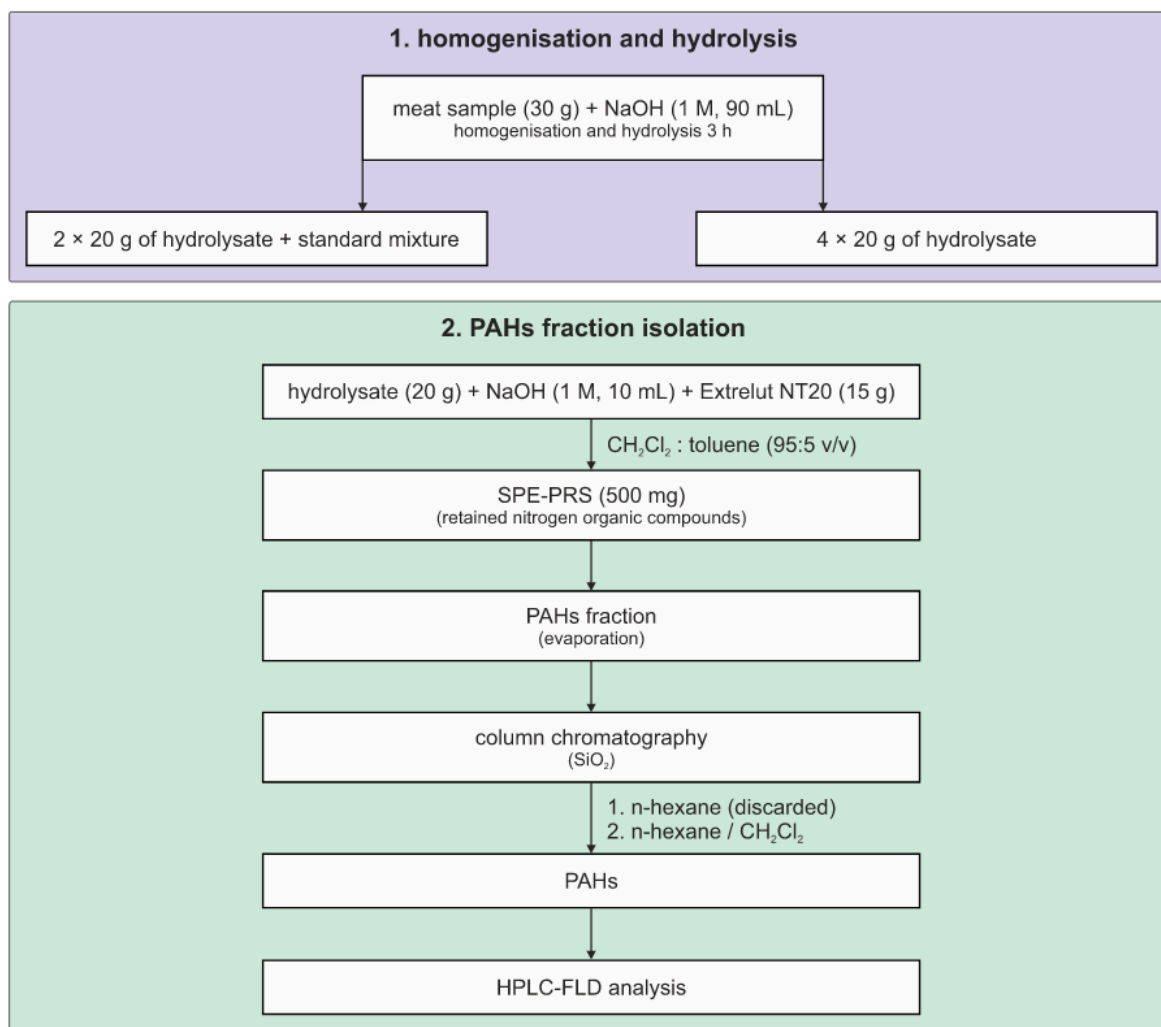

**Figure S1.** Scheme of analytical procedure for separation and determination of polycyclic aromatic hydrocarbons (PAHs) in meat samples.

**Abbreviations:**

SPE - Solid phase extraction

SPE-PRS - SPE columns filled with propyl sulfonic acid (PRS)

HPLC-FLD – high performance liquid chromatography with fluorescence detector

Standard mixture contained PAHs standards
